# Supplementary material
Source: PubMed Central journal article supplement (PMC5766736)
Supplement: 10.1074_M117.802223_jbc.M117.802223-1.pdf [file 10.1074_M117.802223_jbc.M117.802223-1.pdf]

Mevalonate 5-diphosphate mediates ATP binding to the mevalonate diphosphate decarboxylase from the bacterial pathogen *Enterococcus faecalis*

**Chun-Liang Chen<sup>1</sup>, James C. Mermoud<sup>1</sup>, Lake N. Paul<sup>2</sup>, Calvin Nicklaus Steussy<sup>1</sup> and Cynthia V. Stauffacher<sup>1,3\*</sup>**

From the <sup>1</sup>Department of Biological Sciences, Purdue University, West Lafayette, IN, 47907, USA, <sup>2</sup>Biophysical Analysis Laboratory, Bindley Bioscience Center, Purdue University, West Lafayette, IN, 47906, USA, <sup>3</sup>Purdue University Center for Cancer Research (PUCCR), Purdue University, West Lafayette, IN, 47907, USA

Contents:

Supplementary Table S1

Supplementary Table S2

Supplementary Figure S1A and S1B

**Supplementary Table S1.** Structural information of the published structures of MDD from *S. epidermidis* (27)\*.

|                                                                                                                                                                                                                         |                |                |                |            |
|-------------------------------------------------------------------------------------------------------------------------------------------------------------------------------------------------------------------------|----------------|----------------|----------------|------------|
| PDB accession code                                                                                                                                                                                                      | 4DPT           | 4DPU           | 4DPW           | 4DU7       |
| Protein                                                                                                                                                                                                                 | $MDD_{SE}^*$   | $MDD_{SE}$     | $MDD_{SE}$     | $MDD_{SE}$ |
| Wild type/mutation                                                                                                                                                                                                      | Wild type      | S192A          | D283A          | Wild type  |
| Ligands**                                                                                                                                                                                                               | FMVAPP         | FMVAPP         | MVAPP          | MVAPP      |
|                                                                                                                                                                                                                         | ATP $\gamma$ S | ATP $\gamma$ S | ATP $\gamma$ S | --         |
| Resolution (Å)                                                                                                                                                                                                          | 2.2            | 1.9            | 2.6            | 2.2        |
| Undefined region                                                                                                                                                                                                        | 184-193        | --             | --             | 183-186    |
| Metal ion                                                                                                                                                                                                               | No             | No             | No             | No         |
| Distance between 3'-O of MVAPP (or FMVAPP) and $\gamma$ -P of ATP $\gamma$ S (Å)**                                                                                                                                      | 5.5            | 5.9            | 6.1            | --         |
| *MDD stands for the mevalonate diphosphate decarboxylase and $_{SE}$ stands for <i>Staphylococcus epidermidis</i> . **FMVAPP: 6-fluoromevlonate diphosphate, ATP $\gamma$ S: adenosine 5'-( $\gamma$ -thio)triphosphate |                |                |                |            |

**Supplementary Table S2.** Patterns of dead-end inhibition of a bi-substrate reaction\*

| Mechanism                               | Competitive inhibitor mimicking a substrate | Inhibition pattern** |                |
|-----------------------------------------|---------------------------------------------|----------------------|----------------|
|                                         |                                             | Varied [A]           | Varied [B]     |
| Sequential ordered with A binding first | A                                           | Competitive          | Noncompetitive |
| Sequential ordered with A binding first | B                                           | Uncompetitive        | Competitive    |
| Sequential ordered with B binding first | A                                           | Competitive          | Uncompetitive  |
| Sequential ordered with B binding first | B                                           | Noncompetitive       | Competitive    |
| Sequential random                       | A                                           | Competitive          | Noncompetitive |
| Sequential random                       | B                                           | Noncompetitive       | Competitive    |
| Ping-Pong                               | A                                           | Competitive          | Uncompetitive  |
| Ping-Pong                               | B                                           | Uncompetitive        | Competitive    |

\*The table is modified from Table 11.2 in the text book “Enzymes: A Practical Introduction to Structure, Mechanism and Data Analysis” edit by Robert A. Copeland(33).  
 \*\*The reactions would be conducted at a non-saturating concentration (about the  $K_m$  value) of the fixed substrate.

**Supplementary Figure S1** Active-site structural comparison of MDD<sub>SE</sub>-FMVAPP-ATP $\gamma$ S and MDD<sub>EF</sub>-ATP. (A) Stereo view of the ligands in the active site of MDD<sub>SE</sub> and interacting residues around the ATP binding pocket of MDD<sub>SE</sub>. (B) Stereo view of ATP in the active site of MDD<sub>EF</sub> and interacting residues around the ATP binding pocket of MDD<sub>EF</sub>.

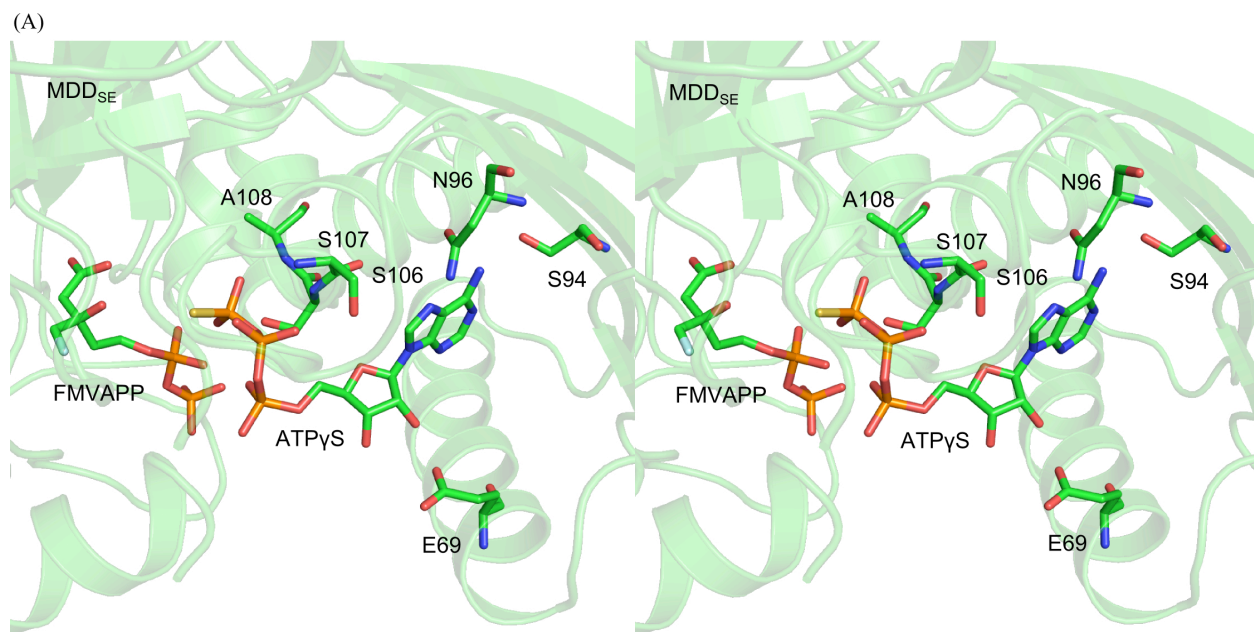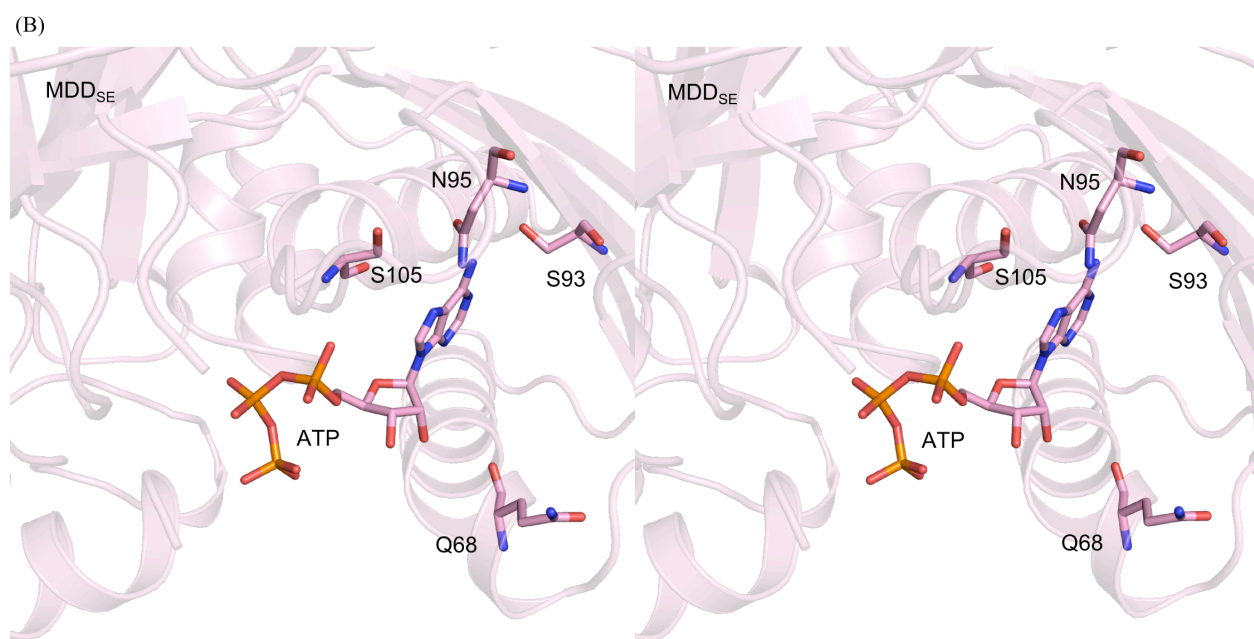

Supplementary Figure S1A and S1B
